# Supplementary material
Source: PubMed Central journal article supplement (PMC10315282)
Supplement: kiad119_supplementary_data.pdf [file kiad119_supplementary_data.pdf]

**Supplemental Figure S1.** The sugar components analysis in fruit ripening stage of F<sub>2</sub> hybrid progenies in 2018 and 2019 year. The X-axis shows sugar content (mg·g<sup>-1</sup> FW, fresh weight).

**2018**

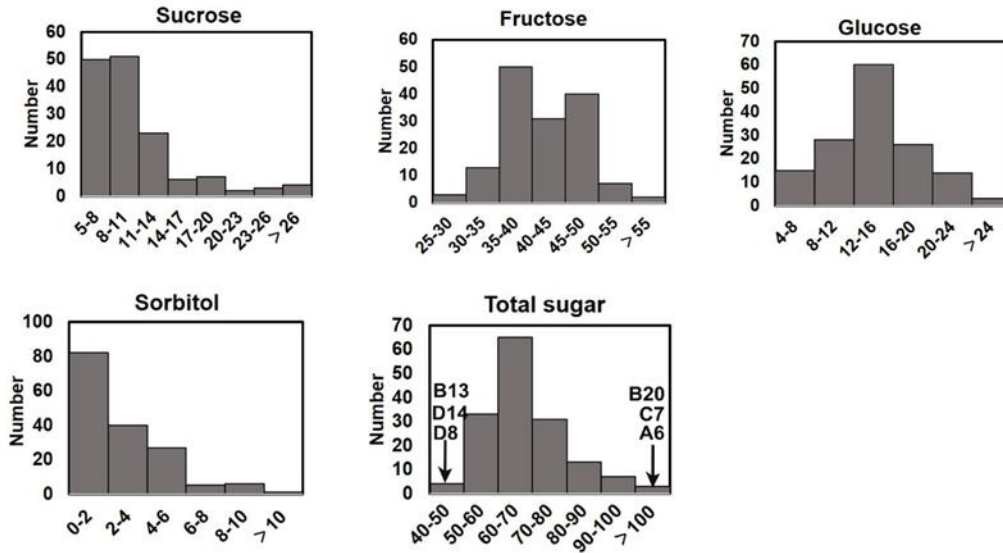

**2019**

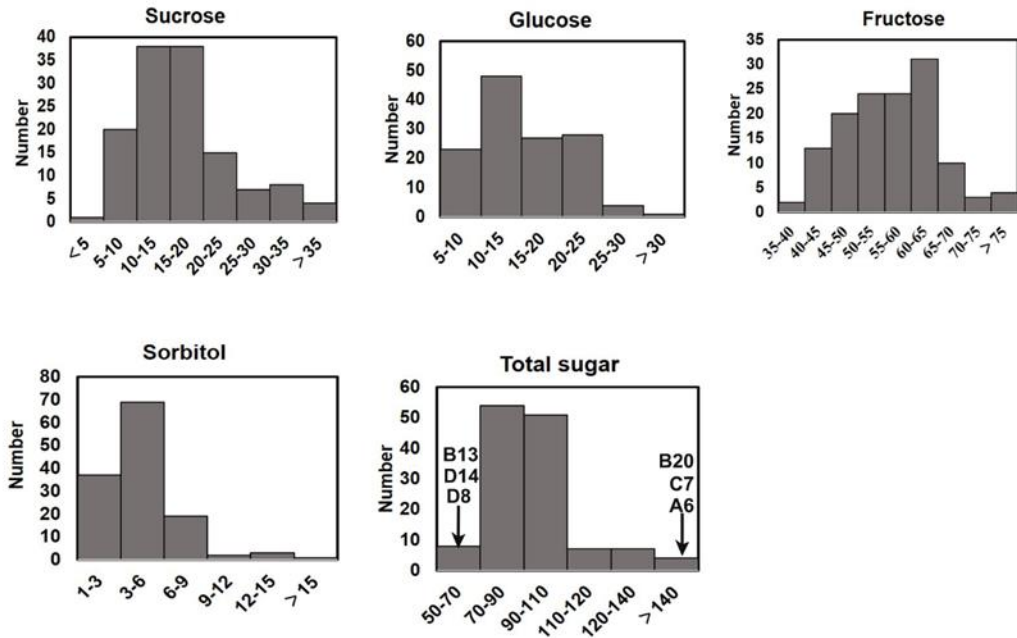

**Supplemental Figure S2.** Phenotypes of fruit development of different lines. Numbers indicate days after full blooms (d). H1-H3 and L1-L3 represent different lines. The fruit images were digitally extracted for comparison. Bars = 3 cm.

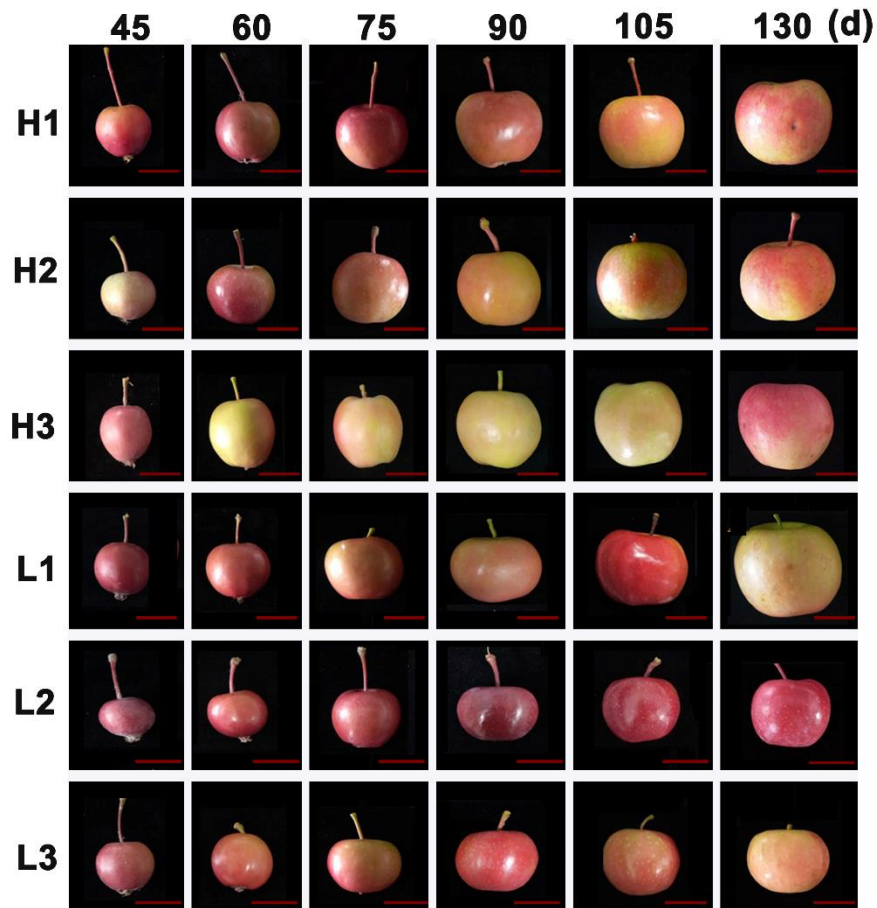

**Supplemental Figure S3.** Evolutionary tree analysis of SWEET III subfamily in *Arabidopsis Thaliana* and apple. Scale bar = 0.2 substitutions/site. (*Arabidopsis thaliana* sequences are available on the <https://www.arabidopsis.org/website>; login number is as follows: AtSWEET9: AT2G39060.1; AtSWEET10: AT5G50790.1; AtSWEET11: AT3G48740.1; AtSWEET12: AT5G23660.1; AtSWEET13: AT5G50800.1; AtSWEET14: AT4G25010.1; AtSWEET15: AT5G13170.1).

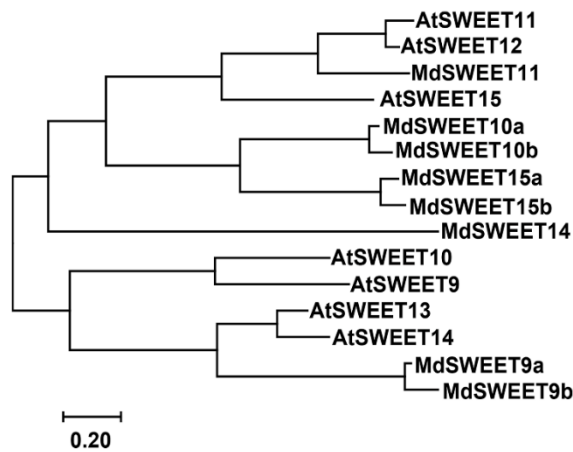

**Supplemental Figure S4.** RT-qPCR analysis of SWEET III subfamily expression in different sugar content lines. The samples used were fruits that ripened 130 days after full bloom. Error bars represent the  $\pm$  SD of three independent biological replicates.

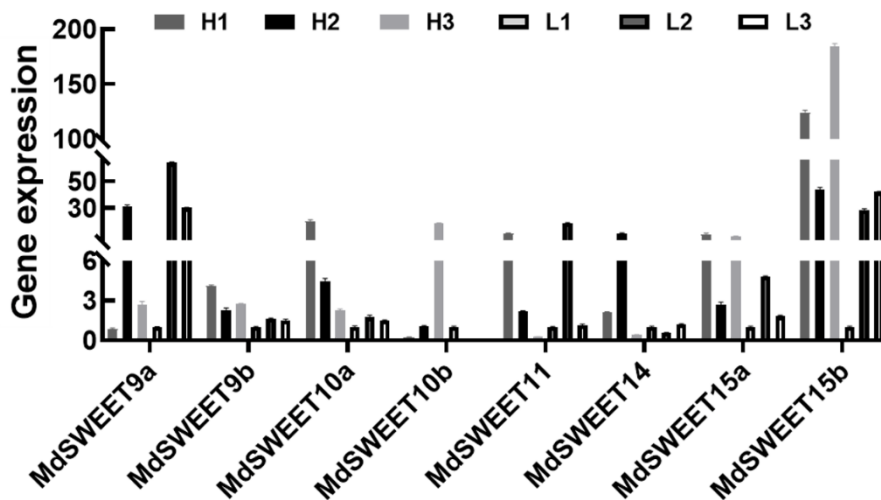

**Supplemental Figure S5.** Expression levels of *MdSWEET9b/10a/15a/15b* in 30 hybrid progenies. Different lines marked on the X-axis. Error bars represent the  $\pm$  SD of three independent biological replicates.

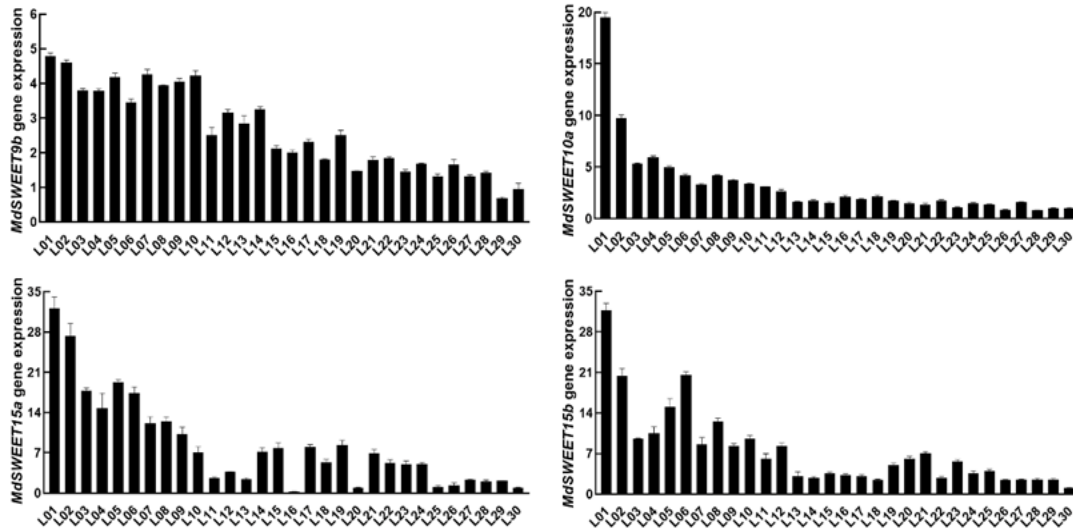

**Supplemental Figure S6.** Analysis of the relationship between *MdSWEET9b* expression level and the contents of sugar components (sucrose, fructose, glucose and sorbitol) in 30 hybrid progenies. Analyze and draw using Microsoft Excel. All progeny samples were mature fruits. Note: FW means fresh weight.

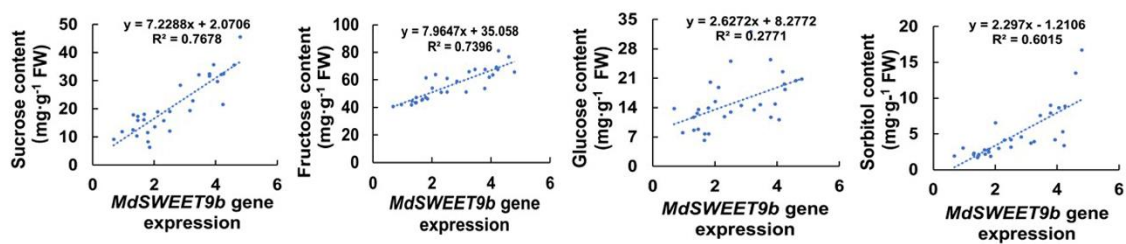

**Supplemental Figure S7.** Cell-specific localization of MdSWEET9b transcripts analyzed by *in situ* hybridization. (A). The cross-sections of ripe apple fruits were hybridized with *MdSWEET9b* specific anti-sense probes. (B). The sense probe was used as a control. The vascular bundle and surrounding parenchyma cells were outlined by dotted lines. The location containing the target gene was stained blue-purple. The mRNA signal mainly concentrated in the vascular bundle sieve elements (SE) and its surrounding parenchyma cells (VC), and pulp cells (PC) also showed weak signal. This result was repeated twice independently, which was the same as the result in Figure 3A.

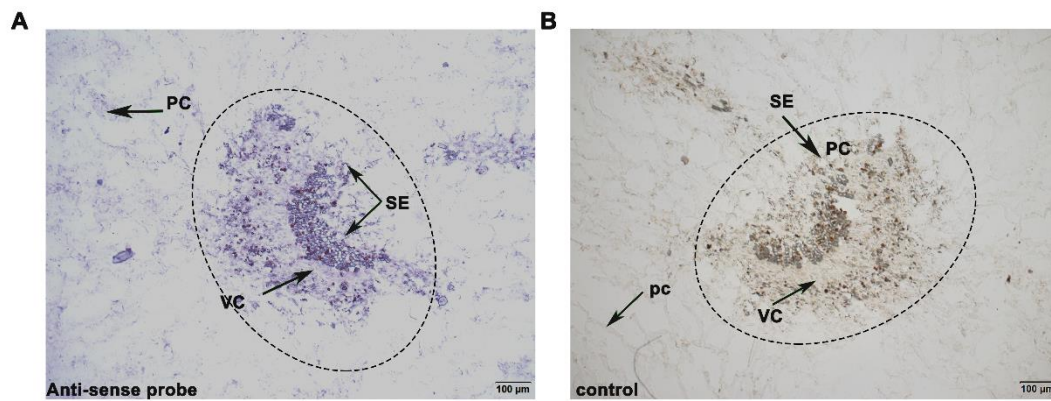

**Supplemental Figure S8.** Functional validation of MdSWEET9b in yeast mutants EBY.VW4000 lacking hexose transport. Yeast cells with vector as a negative control. The numbers under the panel indicate the dilution fold.

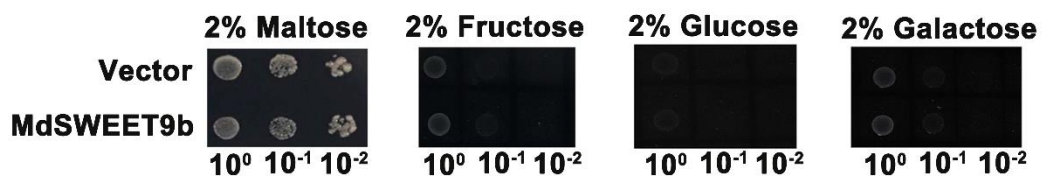

**Supplemental Figure S9.** Phenotypes of *MdSWEET9b* and *MdWRKY9* transgenic calli. (A). Phenotype of *MdSWEET9b* overexpression calli (OE-S9b-2/4/6) and CRISPR/Cas9 knockdown calli (S9b-Cas9-3/5/7). (B). Phenotype of *MdWRKY9* overexpression calli (W9-OE-2/4/6) and CRISPR/Cas9 knockdown calli (W9-Cas9-1/2/3).

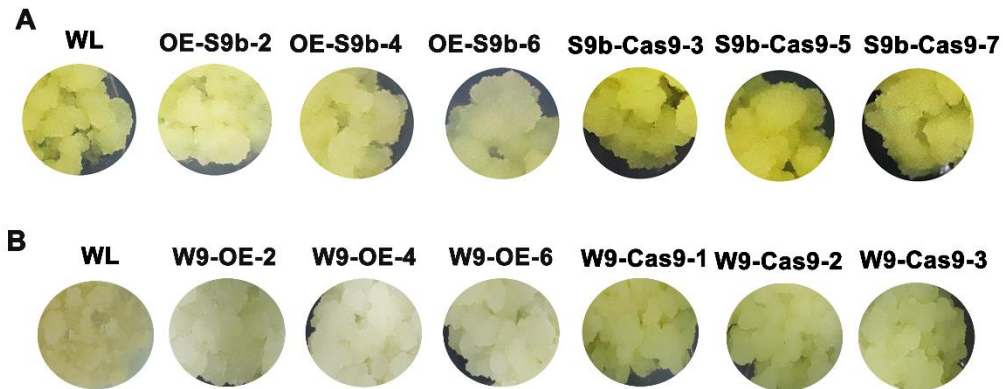

**Supplemental Figure S10.** Content analysis of sugar components in *MdWRKY9* transgenic calli. Fructose (A), glucose (B) and sorbitol (C) contents in *MdWRKY9* transgenic calli (*MdWRKY9* overexpression calli: W9-OE-2/4/6 and CRISPR/Cas9 knockdown calli: W9-Cas9-1/2/3). FW, fresh weight. Error bars represent the  $\pm$  SD of three independent biological replicates. Asterisks indicate statistical significance by SPSS statistical 22 software. (\*\* $P < 0.01$ , \* $P < 0.05$ , Student's *t*-test).

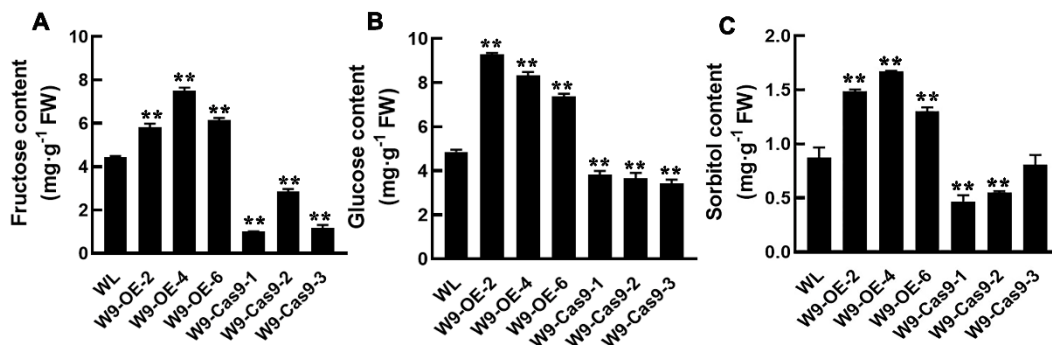

**Supplemental Figure S11.** The expression levels of *MdSWEET9b* and *MdWRKY9* in *MdWRKY9* and *MdSWEET9b* single and co-transferable calli. (A). The expression levels of *MdSWEET9b* gene. (B). The expression levels of *MdWRKY9* gene. Error bars represent the  $\pm$  SD of three independent biological replicates. Asterisks indicate statistical significance by SPSS statistical 22 software. (\*\* $P < 0.01$ , \* $P < 0.05$ , Student's *t*-test).

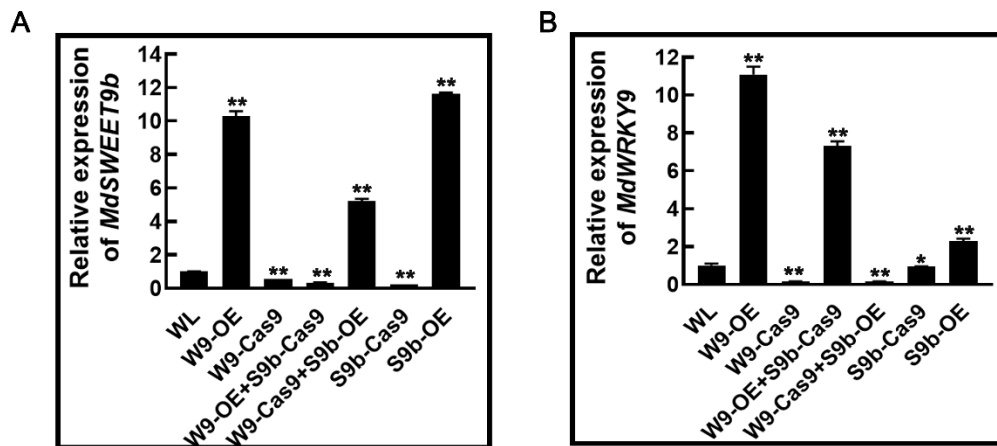

**Supplemental Figure S12.** Content analysis of sugar components in *MdWRKY9* and *MdSWEET9b* single and co-transferable calli. The content of Fructose (A), glucose (B) and sorbitol (C) in calli. FW, fresh weight. Error bars represent the  $\pm$  SD of three independent biological replicates. Asterisks indicate statistical significance by SPSS statistical 22 software (\*\* $P < 0.01$ , \* $P < 0.05$ , Student's *t*-test).

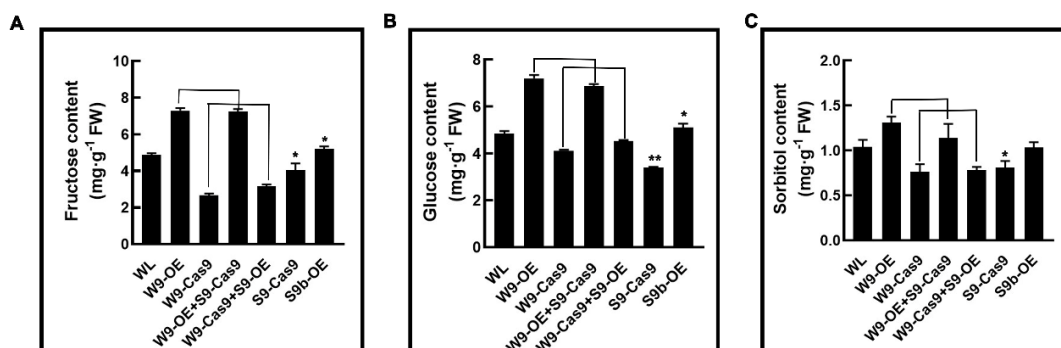





**Supplemental Figure S14.** Images of fruit starch staining treated with ABA and ABA inhibitor FLU. The fruits were dyed in starch potassium iodide solution for 1 min. The fruit images were digitally extracted for comparison. Bars = 2 cm. H1-H3 and L1-L3 represent different lines. The treatment condition: CK: water solution, 0.5 mM ABA: 0.5 mmol·L<sup>-1</sup> abscisic acid solution, 50 μM FLU: 50 μmol·L<sup>-1</sup> fluridone solution.

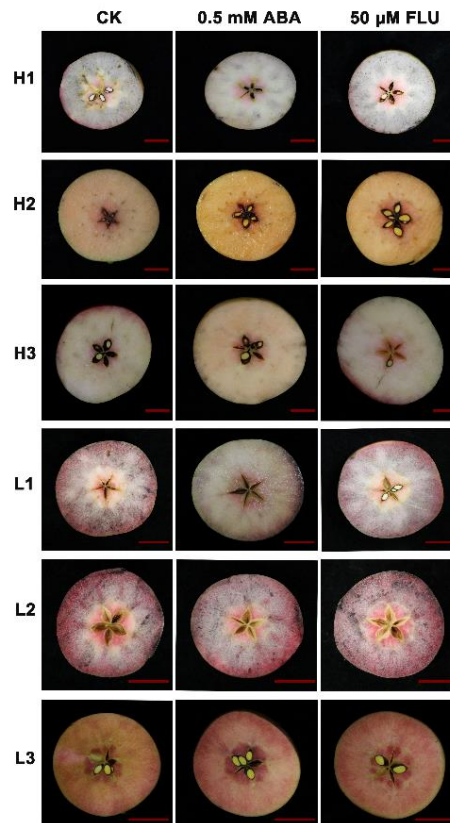

**Supplemental Figure S15.** The interaction between ABA signal transduction related proteins (MdSnRK2A/2E/2I, MdbZIP23/46, MdPP2C51/6/56) and MdWRKY9 were verified by Y2H assay.

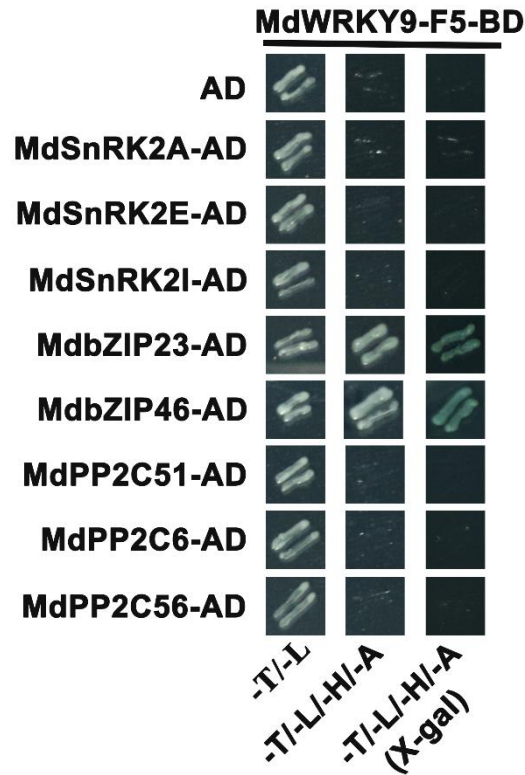

**Supplemental Figure S16.** Analysis of the expression level of *MdbZIP23* and *MdbZIP46* in different sugar content lines at development stage. Numbers indicate days after full blooms (d). H1-H3 and L1-L3 represent different lines. Error bars represent the averages of three biological replicates  $\pm$  SD. Different letters represent differences in the fruit development process. Significance was defined at  $P < 0.05$  (Student's *t*-test).

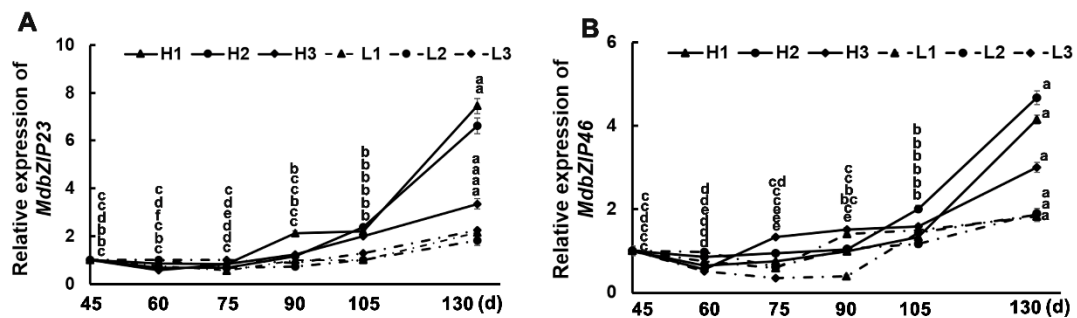

**Supplemental Figure S17.** The EMSA experiment was used to detect the binding of MdbZIP23 and MdbZIP46 to G-box1 and G-box2 of *MdWRKY9* promoter. The ‘+’ and ‘-’ indicate the presence and absence of the indicated probe or protein, respectively.

**G-box1** CCGCCACCTACCATTACGTCTACGTGGGCACTCTCCGCAGTCAAGT

**G-box2** ATCTTATTTGAAAAAGGAGTCACGTGTGTTATTCAGCTAACGAAGT

|                     |               |               |               |               |
|---------------------|---------------|---------------|---------------|---------------|
| <b>MdbZIP23-GST</b> | +             | +             | -             | -             |
| <b>MdbZIP46-GST</b> | -             | -             | +             | +             |
| <b>Hot probe</b>    | <b>G-box1</b> | <b>G-box2</b> | <b>G-box1</b> | <b>G-box2</b> |

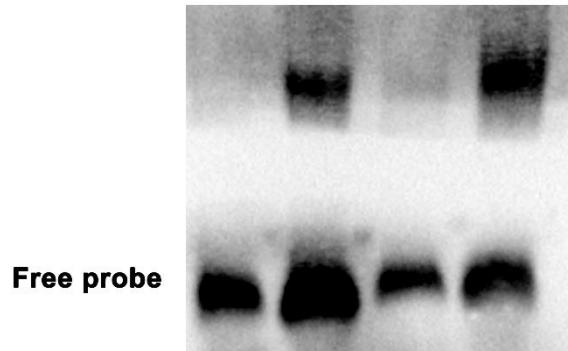

**Supplemental Table S1.** Correlation analysis of total sugar and sugar components in F<sub>2</sub> hybrid progenies of 2018 and 2019 year. Asterisks indicate statistical significance (\*\**P* < 0.01, \**P* < 0.05, Student's *t*-test).

| <b>Year</b> | <b>Phenotype</b> | <b>Total sugar</b> | <b>Fructose</b> | <b>Glucose</b> | <b>Sucrose</b> | <b>Sorbitol</b> |
|-------------|------------------|--------------------|-----------------|----------------|----------------|-----------------|
| 2018        | Total sugar      | 1                  | .765**          | .614**         | .859**         | .448*           |
|             | Fructose         | .765**             | 1               | .055*          | .374*          | .053            |
|             | Glucose          | .614**             | .055*           | 1              | .736**         | .363*           |
|             | Sucrose          | .859**             | .374*           | .736**         | 1              | .530*           |
|             | Sorbitol         | .448*              | .053            | .363*          | .530*          | 1               |
| 2019        | Total sugar      | 1                  | .803**          | .393*          | .813**         | .616**          |
|             | Fructose         | .803**             | 1               | .032           | .492*          | .391*           |
|             | Glucose          | .393*              | .032            | 1              | .095           | .159            |
|             | Sucrose          | .813**             | .492*           | .095           | 1              | .487*           |
|             | Sorbitol         | .616**             | .391*           | .159           | .487*          | 1               |

**Supplemental Table S2.** Primers used in this study.

| Role    | Name                | primer (5'-3')         |
|---------|---------------------|------------------------|
| RT-qPCR | <i>MdSWEET9a-F</i>  | GTGGTTCCTTCTACGGACTA   |
|         | <i>MdSWEET9a-R</i>  | CTCAACTTCTTCATCTCCATAG |
|         | <i>MdSWEET9b-F</i>  | TGTGGTTCCTTCTACGGATT   |
|         | <i>MdSWEET9b-R</i>  | AACTTCTTCATCTCCTGAGT   |
|         | <i>MdSWEET10a-F</i> | ACTGGGCTTCTTCTTAGG     |
|         | <i>MdSWEET10a-R</i> | ATGTCACCTTGTAATGTCCAC  |
|         | <i>MdSWEET10b-F</i> | TTCAAATGGCGGTTTACG     |
|         | <i>MdSWEET10b-R</i> | GACTCAGTTCTGGACACA     |
|         | <i>MdSWEET11-F</i>  | TGTTATGGCTTACTCCTCAA   |
|         | <i>MdSWEET11-R</i>  | CTTGTACCTCCACCTCAG     |
|         | <i>MdSWEET14-F</i>  | CTTTGGGTTGGTTCAGATG    |
|         | <i>MdSWEET14-R</i>  | GCTCAGGAGTAGTAGTCAA    |
|         | <i>MdSWEET15a-F</i> | CTTCAGATGCTGCTGTATG    |
|         | <i>MdSWEET15a-R</i> | CGTCATCATTGCGATTGT     |
|         | <i>MdSWEET15b-F</i> | CTTCAGATGCTGCTGTATG    |
|         | <i>MdSWEET15b-R</i> | GGTGTCAATTGTTGCGATT    |
|         | <i>MdZEP-F</i>      | TGTGCTATTGACGGAGAG     |
|         | <i>MdZEP-R</i>      | GCGAGCGTATTGTTATTGA    |
|         | <i>MdNCED1-F</i>    | CTCCGAGAATCTGAACCT     |
|         | <i>MdNCED1-R</i>    | TCGTCACCGTAGATATGC     |
|         | <i>MdNCED2-F</i>    | ACGACAAGACCAAGATGT     |
|         | <i>MdNCED2-R</i>    | ATCCAATCACAACGACCT     |
|         | <i>MdAAO-F</i>      | TCCAGCAAGAGTAAGCAT     |
|         | <i>MdAAO-R</i>      | TCCAGCAAGAGTAAGCAT     |
|         | <i>MdCYP70A2-F</i>  | CTCATCCTCCTCCATCAC     |
|         | <i>MdCYP70A2-R</i>  | AGTTGCCTTCTCGTTTCT     |
|         | <i>MdCYP70A4-F</i>  | ATTCTTCTCAGACCCTCAAA   |
|         | <i>MdCYP70A4-R</i>  | CAACTTGGCAAGCTCATT     |
|         | <i>MdSRK2I-F</i>    | TGAGGAGGCTACTATACCA    |
|         | <i>MdSRK2I-R</i>    | CGCTGCTATCAACATCAAG    |
|         | <i>MdSRK2E-F</i>    | AACTTCCGAAGACAATAC     |
|         | <i>MdSRK2E-R</i>    | TTCGTGGTTCCTGATCTC     |
|         | <i>MdSRK2A-F</i>    | CTCTCTCGCATCTTTGTTG    |
|         | <i>MdSRK2A-R</i>    | GCTTCTCCACTATCTTCA     |
|         | <i>MdbZIP46-F</i>   | TAGCAGTGTGGTGTGAT      |
|         | <i>MdbZIP46-R</i>   | GCTGAGAAGTGTGTAAGTC    |
|         | <i>MdbZIP23-F</i>   | TAATGTTGGTGGAGTGAGAA   |
|         | <i>MdbZIP23-R</i>   | AGCGGTGTTAATAGAAGGT    |

|                                        |                                                      |                                                            |
|----------------------------------------|------------------------------------------------------|------------------------------------------------------------|
|                                        | <i>MdPP2C51-F</i>                                    | GGCCGTATGTGATATCAAAACC                                     |
|                                        | <i>MdPP2C51-R</i>                                    | GTCGACGACAATCACACTAATG                                     |
|                                        | <i>MdPP2C6-F</i>                                     | CAAGACCCAAATGACTTAACCG                                     |
|                                        | <i>MdPP2C6-R</i>                                     | TTCGCAATTTCTAGCTCTTCG                                      |
|                                        | <i>MdPP2C56-F</i>                                    | AGATCTCACCCGTTTCATTTCT                                     |
|                                        | <i>MdPP2C56-R</i>                                    | GCATTCTCTCAGCGCAAATTT                                      |
|                                        | <i>MdPYL2-F</i>                                      | ATGAGTTCGTTAATTGCGATGG                                     |
|                                        | <i>MdPYL2-R</i>                                      | GTTCAACTTGATCACAGTGTCC                                     |
|                                        | <i>MdActin-F</i>                                     | TGACCGAATGAGCAAGGAAATTACT                                  |
|                                        | <i>MdActin-R</i>                                     | TACTCAGCTTTGGCAATCCACATC                                   |
| <b>Location and transgene</b>          | MdSWEET9b (PRI101-GFP)-F                             | ttgatacatatgccctcgacATGCGGTTCTTGAATACTGAACAA (Sal I)       |
|                                        | MdSWEET9b (PRI101-GFP)-R                             | tcagaattcggtagccccgggTACGTGTTTCATCGTTTGCTTCG (Sma I)       |
|                                        | MdWRKY9 (PRI101-GFP)-F                               | ttgatacatatgccctcgacATGACTTCTTCCTTCACGAACTTC (Sal I)       |
|                                        | MdWRKY9 (PRI101-GFP)-R                               | tcagaattcggtagccccgggGAACTCAGAAAATCCATAACTTCCTTC (Sma I)   |
| <b>In situ hybridization</b>           | MdSWEET9b-sense                                      | AATTAACCCTCACTAAAGGGctcataatgcttagaggagcagcaaa (5'Dig, T3) |
|                                        | MdSWEET9b-antisense                                  | TAATACGACTCACTATAGGGaagtgcgactttattgtgt (5'Dig, T7)        |
| <b>Transformation of yeast mutants</b> | MdSWEET9b (pYES-DEST2)-F                             | ACCGGTATGCGGTTCTTGAATACTGAACA (Age I)                      |
|                                        | MdSWEET9b (pYES-DEST2)-R                             | GTTTAAACTACGTGTTTCATCGTTTGCTTC (Pem I)                     |
| <b>Y1H and Y2H</b>                     | proSWEET9b (pABAi)-F                                 | gaaaagcttgaattcgagctcGCATGTTTAAAGCCTTATAACATGTTTT (Sac I)  |
|                                        | proSWEET9b (pABAi)-R                                 | agcacatgcctcaggctcgacCGACACTGCAAAAAGCTTAAGGA (Sal I)       |
|                                        | proSWEET9b (pHIS2)-F                                 | gactcactatagggcgaattcGCATGTTTAAAGCCTTATAACATGTTTT (EcoR I) |
|                                        | proSWEET9b (pHIS2)-R                                 | gattcgcgaacgcgtgagctcCGACACTGCAAAAAGCTTAAGGA (Sac I)       |
|                                        | MdWRKY9 (pGADT7)-F                                   | gtaccagattacgctcatatgATGACTTCTTCCTTCACGAACTTC (Nde I)      |
|                                        | MdWRKY9 (pGADT7)-R                                   | cagctcgagctcgatgatccGAACTCAGAAAATCCATAACTTCCTTC (BamH I)   |
|                                        | MdSnRK2L (pGADT7)-F                                  | gtaccagattacgctcatatgATGGATCGGCAGGCAATGA (Nde I)           |
|                                        | MdSnRK2L (pGADT7)-R                                  | cagctcgagctcgatgatccAATTGCGTAGACTATTTCCCG (BamH I)         |
|                                        | MdSnRK2E (pGADT7)-F                                  | gtaccagattacgctcatatgATGAATCGGTCTGTGCTCACAGT (Nde I)       |
|                                        | MdSnRK2E (pGADT7)-R                                  | cagctcgagctcgatgatccAATTGCATAGACTATCTCTCCGCTG (BamH I)     |
|                                        | MdSnRK2A (pGADT7)-F                                  | gtaccagattacgctcatatgATGGAGAAGTACGAGCTTGTTAAGG (Nde I)     |
|                                        | MdSnRK2A (pGADT7)-R                                  | cagctcgagctcgatgatccGCTGAAGCGCACTTCTCCAC (BamH I)          |
|                                        | MdbZIP46 (pGADT7)-F                                  | gtaccagattacgctcatatgATGGGAAGCAACATGAATTCAA (Nde I)        |
|                                        | MdbZIP46 (pGADT7)-R                                  | cagctcgagctcgatgatccCCATTCTGCCGCATGAATCT (BamH I)          |
|                                        | MdbZIP23 (pGADT7)-F                                  | gtaccagattacgctcatatgATGGGGTCTAATTTCAACTTCAAGA (Nde I)     |
|                                        | MdbZIP23 (pGADT7)-R                                  | cagctcgagctcgatgatccCCAAGGCCTGTCAATGTTC (BamH I)           |
|                                        | MdPP2C56 (pGADT7)-F                                  | gtaccagattacgctcatatgATGGACTCCACAGAGTCGAGC (Nde I)         |
|                                        | MdPP2C56 (pGADT7)-R                                  | cagctcgagctcgatgatccTAGCCTTGCTGGCGTTTTTC (BamH I)          |
|                                        | MdPP2C51 (pGADT7)-F                                  | gtaccagattacgctcatatgATGAATGAAAAGATGAGACGAAAGAG (Nde I)    |
|                                        | MdPP2C51 (pGADT7)-R                                  | cagctcgagctcgatgatccGCTGGTTTTTGTGAGGTCGACG (BamH I)        |
| MdPP2C6 (pGADT7)-F                     | gtaccagattacgctcatatgATGGAGGATTTAGCTCAGGCAG (Nde I)  |                                                            |
| MdPP2C6 (pGADT7)-R                     | cagctcgagctcgatgatccGGGTTTTTCTTAACTTCCTTGTG (BamH I) |                                                            |

|                               |                                                          |                                                                       |
|-------------------------------|----------------------------------------------------------|-----------------------------------------------------------------------|
|                               | MdWRKY9-FL (pGBKT7)-F                                    | tcagaggaggacctgcatatgATGACTTCTTCTTCACGAACCTC (Nde I)                  |
|                               | MdWRKY9-FL (pGBKT7)-R                                    | ccgctgcaggtcgacggatccTCAGAACTCAGAAAATCCATAACTTCC (BamH I)             |
|                               | MdWRKY9-F1 (pGBKT7)-F                                    | tcagaggaggacctgcatatgATGACTTCTTCTTCACGAACCTC (Nde I)                  |
|                               | MdWRKY9-F1 (pGBKT7)-R                                    | ccgctgcaggtcgacggatccATGCAAGTAATCGGACTTGGGA (BamH I)                  |
|                               | MdWRKY9-F2 (pGBKT7)-F                                    | tcagaggaggacctgcatatgATGCATTCTACTCAATCTTCGCAA (Nde I)                 |
|                               | MdWRKY9-F2 (pGBKT7)-R                                    | ccgctgcaggtcgacggatccGTTTTGTTCAAACATCCTCTCCC (BamH I)                 |
|                               | MdWRKY9-F3 (pGBKT7)-F                                    | tcagaggaggacctgcatatgATGTCTCCAATAAGTAATTCAGGAGGA (Nde I)              |
|                               | MdWRKY9-F3 (pGBKT7)-R                                    | ccgctgcaggtcgacggatccGCTCCACGAGCTGCGGG (BamH I)                       |
|                               | MdWRKY9-F4 (pGBKT7)-F                                    | tcagaggaggacctgcatatgATGGGCAATTACAGCAATGCA (Nde I)                    |
|                               | MdWRKY9-F4 (pGBKT7)-R                                    | ccgctgcaggtcgacggatccTCAGAACTCAGAAAATCCATAACTTCC (BamH I)             |
|                               | MdWRKY9-F5 (pGBKT7)-F                                    | tcagaggaggacctgcatatgATGTCTACTCAATCTTCGCAATATGG (Nde I)               |
|                               | MdWRKY9-F5 (pGBKT7)-R                                    | ccgctgcaggtcgacggatccGAACTCAGAAAATCCATAACTTCTTC (BamH I)              |
| LUC                           | MdWRKY9 (pGreenII62-SK)-F                                | cgctctagaactagtgatccATGACTTCTTCTTCACGAACCTC (BamH I)                  |
|                               | MdWRKY9 (pGreenII62-SK)-R                                | gtcgacggtatcgataagcttGAACTCAGAAAATCCATAACTTCTTC (Hind III)            |
|                               | MdbZIP23 (pGreenII62-SK)-F                               | cgctctagaactagtgatccATGGGGTCTAATTTCAACTCAAGA (BamH I)                 |
|                               | MdbZIP23 (pGreenII62-SK)-R                               | gtcgacggtatcgataagcttCCAAGGCCTGTCAATGTTC (Hind III)                   |
|                               | MdbZIP46 (pGreenII62-SK)-F                               | cgctctagaactagtgatccATGGGAAGCAACATGAACTTCAA (BamH I)                  |
|                               | MdbZIP46 (pGreenII62-SK)-R                               | gtcgacggtatcgataagcttCCATTCTGCCGCATGAATCT (Hind III)                  |
|                               | proMdSWEET9b (pGreenII0800-Luc)-F                        | gggccccccctcgaggtcgacTTCCAATCAATTAAGTGAACCACAT (Sal I)                |
|                               | proMdSWEET9b (pGreenII0800-Luc)-R                        | cgctctagaactagtgatccTCGTTGGATCGGATGAATTGA (BamH I)                    |
|                               | proMdWRKY9 (pGreenII0800-Luc)-F                          | gggccccccctcgaggtcgacCATACGAAACATCTTTAAGTATATCCAAA (Sal I)            |
|                               | proMdWRKY9 (pGreenII0800-Luc)-R                          | cgctctagaactagtgatccGTTTTGGCTTCTGTGAGAGAGAA (BamH I)                  |
| EMSA                          | MdWRKY9 (PET32a)-F                                       | gccatggtgatcgatccATGACTTCTTCTTCACGAACCTC (BamH I)                     |
|                               | MdWRKY9 (PET32a)-R                                       | ttgtcgacggagctcgaattcGAACTCAGAAAATCCATAACTTCTTC (EcoR I)              |
|                               | MdbZIP46 (PGEX4T-1)-F                                    | gatctggtccgctggatccATGGGAAGCAACATGAACTTCAA (BamH I)                   |
|                               | MdbZIP46 (PGEX4T-1)-R                                    | ctcgagtcgacccgggaattcCCATTCTGCCGCATGAATCT (EcoR I)                    |
|                               | MdbZIP23 (PGEX4T-1)-F                                    | gatctggtccgctggatccATGGGGTCTAATTTCAACTCAAGA (BamH I)                  |
|                               | MdbZIP23 (PGEX4T-1)-R                                    | ctcgagtcgacccgggaattcCCAAGGCCTGTCAATGTTC (EcoR I)                     |
|                               | MdSWEET9b-W-box (hot probe)-F                            | ATAAGTACAAATTTTCGACTTT <b>TTGACCT</b> AATTTGCGATGTCATTTAA (3' Biotin) |
|                               | MdSWEET9b-W-box (hot probe)-R                            | TTAAATGACATCGCAAATTA <b>GGTCA</b> AAAGTCGAAATTTGTACTTAT (3' Biotin)   |
|                               | MdSWEET9b-W-box (cold probe)-F                           | ATAAGTACAAATTTTCGACTTT <b>TTGACCT</b> AATTTGCGATGTCATTTAA             |
|                               | MdSWEET9b-W-box (cold probe)-R                           | TTAAATGACATCGCAAATTA <b>GGTCA</b> AAAGTCGAAATTTGTACTTAT               |
|                               | MdSWEET9b-W-box (mutant probe)-F                         | ATAAGTACAAATTTTCGACTTT <b>CTGA</b> CTAATTTGCGATGTCATTTAA(3' Biotin)   |
|                               | MdSWEET9b-W-box (mutant probe)-R                         | TTAAATGACATCGCAAATTA <b>GTTCA</b> AGTCGAAATTTGTACTTAT(3' Biotin)      |
|                               | MdWRKY9-G-box1 (hot probe)-F                             | CCGCCACCTACCATTACGCT <b>TACGTG</b> GGCACTCTCCGAGTCAAGT (3' Biotin)    |
|                               | MdWRKY9-G-box1 (hot probe)-R                             | ACTTGACTGCGGAGAGTGCC <b>CACGT</b> AGACGTAATGGTAGGTGGCGG (3' Biotin)   |
|                               | MdWRKY9-G-box2 (hot probe)-F                             | ATCTTATTTGAAAAGGAGT <b>CACGTG</b> TGTTATTAGCTAACGAAGT (3' Biotin)     |
|                               | MdWRKY9-G-box2 (hot probe)-R                             | ACTTCGTTAGCTGAATAACAC <b>CACGTG</b> ACTCCTTTTTCAAATAAGAT (3' Biotin)  |
| MdWRKY9-G-box2 (cold probe)-F | ATCTTATTTGAAAAGGAGT <b>CACGTG</b> TGTTATTAGCTAACGAAGT    |                                                                       |
| MdWRKY9-G-box2 (cold probe)-R | ACTTCGTTAGCTGAATAACAC <b>CACGTG</b> ACTCCTTTTTCAAATAAGAT |                                                                       |

|                                  |                                      |                                                             |
|----------------------------------|--------------------------------------|-------------------------------------------------------------|
|                                  | MdWRKY9-G-box2 (mutant probe)-F      | ATCTTATTTGAAAAAGGAGTTACATGTGTTATTTCAGCTAACGAAGT (3' Biotin) |
|                                  | MdWRKY9-G-box2 (mutant probe)-R      | ACTTCGTTAGCTGAATAACACATGTAACCTCTTTTTCAAATAAGAT (3' Biotin)  |
| <b>ChIP-PCR</b>                  | proMdSWEET9b (Contains W-box site)-F | TTCCAATCAATTAAGTGAACCAC                                     |
|                                  | proMdSWEET9b (Contains W-box site)-R | GTTTTGCCAATTTAAGAAATCA                                      |
| <b>BIFC</b>                      | MdWRKY9 (pUC-SPYCE)-F                | ggatccATGACTTCTTCCTTCACGAACCTC (BamH I)                     |
|                                  | MdWRKY9 (pUC-SPYCE)-R                | gtcgacGAACTCAGAAAATCCATAACTTCCTTC (Sal I)                   |
|                                  | MdbZIP23 (pUC-SPYNE)-F               | ggatccATGGGGTCTAATTTCAACTTCAAGA (BamH I)                    |
|                                  | MdbZIP23 (pUC-SPYNE)-R               | gtcgacCCAAGGGCCTGTCAATGTTC (Sal I)                          |
|                                  | MdbZIP46 (pUC-SPYNE)-F               | ggatccATGGGAAGCAACATGAACTTCAA (BamH I)                      |
|                                  | MdbZIP46 (pUC-SPYNE)-R               | gtcgacCCATTCTGCCGCATGAATCT (Sal I)                          |
| <b>Used for<br/>CRISPR/ Cas9</b> | MdSWEET9b-DT1-BsF                    | ATATATGGTCTCGATTGgccaccatgtggttcttcttaGTT                   |
|                                  | MdSWEET9b-DT1-F0                     | TGgccaccatgtggttcttcttaGTTTTAGAGCTAGAAATAGC                 |
|                                  | MdSWEET9b-DT2-R0                     | AACgcgaccaactttggacgatCAATCTCTTAGTCGACTCTAC                 |
|                                  | MdSWEET9b-DT2-BsR                    | ATTATTGGTCTCGAAACgcgaccaactttggacgatCAA                     |
|                                  | MdWRKY9-DT1-BsF                      | ATATATGGTCTCGATTGgtatggcgagaacaagtgaGTT                     |
|                                  | MdWRKY9-DT1-F0                       | TGgtatggcgagaacaagtgaGTTTTAGAGCTAGAAATAGC                   |
|                                  | MdWRKY9-DT2-R0                       | AACgatggactcaactttcggatCAATCTCTTAGTCGACTCTAC                |
|                                  | MdWRKY9-DT2-BsR                      | ATTATTGGTCTCGAAACgatggactcaactttcggatCAA                    |



**Supplemental Table S3.** List of genes identified from yeast one-hybrid screen using *MdSWEET9b* promoter as bait.

| <b>Gene ID</b> | <b>Annotated Function</b>                                             |
|----------------|-----------------------------------------------------------------------|
| XM_029107854   | F-box protein                                                         |
| XM_008355635   | glutamine synthetase cytosolic isozyme                                |
| XM_008378539   | acyl-CoA-binding domain-containing protein 1-like                     |
| XM_008341717   | hypersensitive-induced response protein 2                             |
| XM_008364737   | NADP-dependent malic enzyme                                           |
| XM_008352628   | ATP synthase subunit beta                                             |
| XM_029099839   | ABC transporter G family member 3                                     |
| XM_029093882   | thioredoxin reductase NTRB-like                                       |
| XM_008395385   | (S)-coclaurine N-methyltransferase                                    |
| XM_029087627   | pyrophosphate--fructose 6-phosphate 1-phosphotransferase subunit beta |
| XM_008364900   | NAD(P)H dehydrogenase (quinone) FQR1-like 2                           |
| NM_001294127   | WRKY transcription factor 9                                           |
| XM_008343854   | LOB domain-containing protein 41                                      |
| XM_008391704   | pyruvate dehydrogenase E1 component subunit beta-1                    |
